# Supplementary material for: Sourdough Fermented Breads are More Digestible than Those Started with Baker’s Yeast Alone: An In Vivo Challenge Dissecting Distinct Gastrointestinal Responses
Source: Nutrients. 2019 Dec 4;11(12):2954. doi: 10.3390/nu11122954 (PMC6950244; doi:10.3390/nu11122954)
Supplement: Supplementary file 1 [file nutrients-11-02954-s001.pdf]

**Table S1.** Proximal composition and energy value of the experimental breads: BYB, leavened with baker's yeast 1.5% for 90 min at 30 °C; SB, sourdough bread leavened with S<sub>4</sub> (20%) and baker's yeast 1.5% for 90 min at 30°C; t-SB, sourdough bread leavened with S<sub>24</sub> (20%) for 4 h at 30 °C. .

|                                 | BYB                      | SB                       | t-SB                     |
|---------------------------------|--------------------------|--------------------------|--------------------------|
| Energy value (kJ/100g)          | 1201 ± 52 <sup>a</sup>   | 1194 ± 57 <sup>a</sup>   | 1176 ± 51 <sup>a</sup>   |
| Total carbohydrates (% of d.m.) | 84.5 ± 0.2 <sup>a</sup>  | 83.8 ± 0.3 <sup>a</sup>  | 83.5 ± 0.2 <sup>a</sup>  |
| Dietary Fibre (% of d.m.)       | 3.10 ± 0.07 <sup>a</sup> | 3.05 ± 0.07 <sup>a</sup> | 3.18 ± 0.08 <sup>a</sup> |
| Lipids (% of d.m.)              | 1.3 ± 0.1 <sup>a</sup>   | 1.2 ± 0.2 <sup>a</sup>   | 1.2 ± 0.1 <sup>a</sup>   |
| Proteins (% of d.m.)            | 10.9 ± 0.5 <sup>a</sup>  | 10.8 ± 0.6 <sup>a</sup>  | 11.1 ± 0.4 <sup>a</sup>  |
| Ash (% of d.m.)                 | 0.5 ± 0.1 <sup>a</sup>   | 0.4 ± 0.1 <sup>a</sup>   | 0.5 ± 0.1 <sup>a</sup>   |

d.m.: dry matter, The data are the means of three independent experiments ± standard deviations ( $n = 3$ ). Values in the same row with different superscript letters differ significantly ( $p < 0.05$ ).

**Table S2.** Gastrointestinal motility: data resulting from the study of the gastric and gallbladder emptying and H<sub>2</sub> breath technique. BYB, leavened with baker's yeast 1.5% for 90 min at 30 °C; SB, sourdough bread leavened with S<sub>4</sub> (20%) and baker's yeast 1.5% for 90 min at 30 °C; t-SB, sourdough bread leavened with S<sub>24</sub> (20%) for 4 h at 30 °C. NU, Nutridrink.

|                               |                           | BYB                      | SB                       | t-SB                     | NU                       |
|-------------------------------|---------------------------|--------------------------|--------------------------|--------------------------|--------------------------|
| Gastric emptying              |                           |                          |                          |                          |                          |
| Basal antral area             | cm <sup>2</sup>           | 4.3 ± 0.3 <sup>a</sup>   | 4.0 ± 0.2 <sup>a</sup>   | 4.2 ± 0.1 <sup>a</sup>   | 4.1 ± 0.2 <sup>a</sup>   |
| Max. postprandial antral area | cm <sup>2</sup>           | 11.4 ± 0.4 <sup>a</sup>  | 11.7 ± 0.5 <sup>a</sup>  | 11.4 ± 0.5 <sup>a</sup>  | 10.7 ± 0.4 <sup>a</sup>  |
| Residual antral area          | cm <sup>2</sup>           | 4.7 ± 0.2 <sup>a</sup>   | 4.2 ± 0.1 <sup>b</sup>   | 4.2 ± 0.1 <sup>b</sup>   | 4.8 ± 0.2 <sup>a</sup>   |
| AUC                           | cm <sup>2</sup> × 120 min | 854 ± 119 <sup>a</sup>   | 774 ± 105 <sup>a</sup>   | 758 ± 105 <sup>b</sup>   | 765 ± 19.1 <sup>a</sup>  |
| Half-emptying time            | min                       | 43.7 ± 4.4 <sup>a</sup>  | 34.8 ± 2.4 <sup>b</sup>  | 30.8 ± 2.3 <sup>b</sup>  | 29.0 ± 1.9 <sup>b</sup>  |
| Emptying rate                 | cm <sup>2</sup> /min      | -1.20 ± 0.1 <sup>a</sup> | -0.28 ± 0.1 <sup>c</sup> | -0.24 ± 0.0 <sup>c</sup> | -0.66 ± 0.0 <sup>b</sup> |
| Gallbladder emptying          |                           |                          |                          |                          |                          |
| Fasting vol.                  | mL                        | 18.9 ± 1.3 <sup>a</sup>  | 18.6 ± 1.1 <sup>a</sup>  | 17.6 ± 1.2 <sup>a</sup>  | 18.6 ± 0.9 <sup>a</sup>  |
| Ejection vol.                 | mL                        | 8.1 ± 0.6 <sup>b</sup>   | 7.3 ± 0.7 <sup>b</sup>   | 6.3 ± 0.7 <sup>b</sup>   | 12.8 ± 0.9 <sup>a</sup>  |
| Residual vol.                 | mL                        | 10.8 ± 1.1 <sup>a</sup>  | 11.3 ± 0.8 <sup>a</sup>  | 11.2 ± 1.2 <sup>a</sup>  | 5.9 ± 0.7 <sup>b</sup>   |
| Time to residual vol.         | min                       | 72.5 ± 3.6 <sup>a</sup>  | 65.0 ± 3.8 <sup>ab</sup> | 68.8 ± 4.3 <sup>a</sup>  | 56.3 ± 3.3 <sup>b</sup>  |
| Ejection rate                 | mL/min                    | -0.1 ± 0.0 <sup>b</sup>  | -0.1 ± 0.0 <sup>b</sup>  | -0.1 ± 0.0 <sup>b</sup>  | -4.1 ± 0.6 <sup>a</sup>  |
| Half-emptying time            | min                       | 33.6 ± 2.8 <sup>a</sup>  | 30.9 ± 2.5 <sup>a</sup>  | 26.7 ± 2.3 <sup>ab</sup> | 21.9 ± 1.4 <sup>b</sup>  |
| Refilling vol.                | mL                        | 16 ± 1.2 <sup>b</sup>    | 15.0 ± 0.9 <sup>b</sup>  | 15.3 ± 1.1 <sup>b</sup>  | 18.6 ± 0.9 <sup>a</sup>  |
| Refilling rate                | mL/min                    | 0.1 ± 0.0 <sup>b</sup>   | 0.1 ± 0.0 <sup>b</sup>   | 0.1 ± 0.0 <sup>b</sup>   | 2.4 ± 0.4 <sup>a</sup>   |
| Half-refilling time           | mL/min                    | 94.4 ± 2.5 <sup>a</sup>  | 90.5 ± 1.4 <sup>a</sup>  | 91.1 ± 2.0 <sup>a</sup>  | 90.3 ± 1.4 <sup>a</sup>  |
| AUC                           | mL × 120 min              | 522 ± 56 <sup>b</sup>    | 548 ± 56.5 <sup>b</sup>  | 432 ± 54.3 <sup>b</sup>  | 1035 ± 75.8 <sup>a</sup> |
| Small intestinal transit      |                           |                          |                          |                          |                          |
| OCTT <sup>†</sup>             | min                       | 89.5 <sup>b</sup>        | 80.5 <sup>bc</sup>       | 69.5 <sup>c</sup>        | 103.2 <sup>a</sup>       |
| H2 peak <sup>†</sup>          | ppm                       | 26.5 <sup>a</sup>        | 21.5 <sup>b</sup>        | 18.5 <sup>b</sup>        | 22.6 <sup>b</sup>        |

Data are expressed as means±SEM with the exception of parameters marked with <sup>†</sup>, expressed as median values.<sup>a-c</sup> Within the same parameter, values with different superscript letters differ significantly (*p* < 0.05).

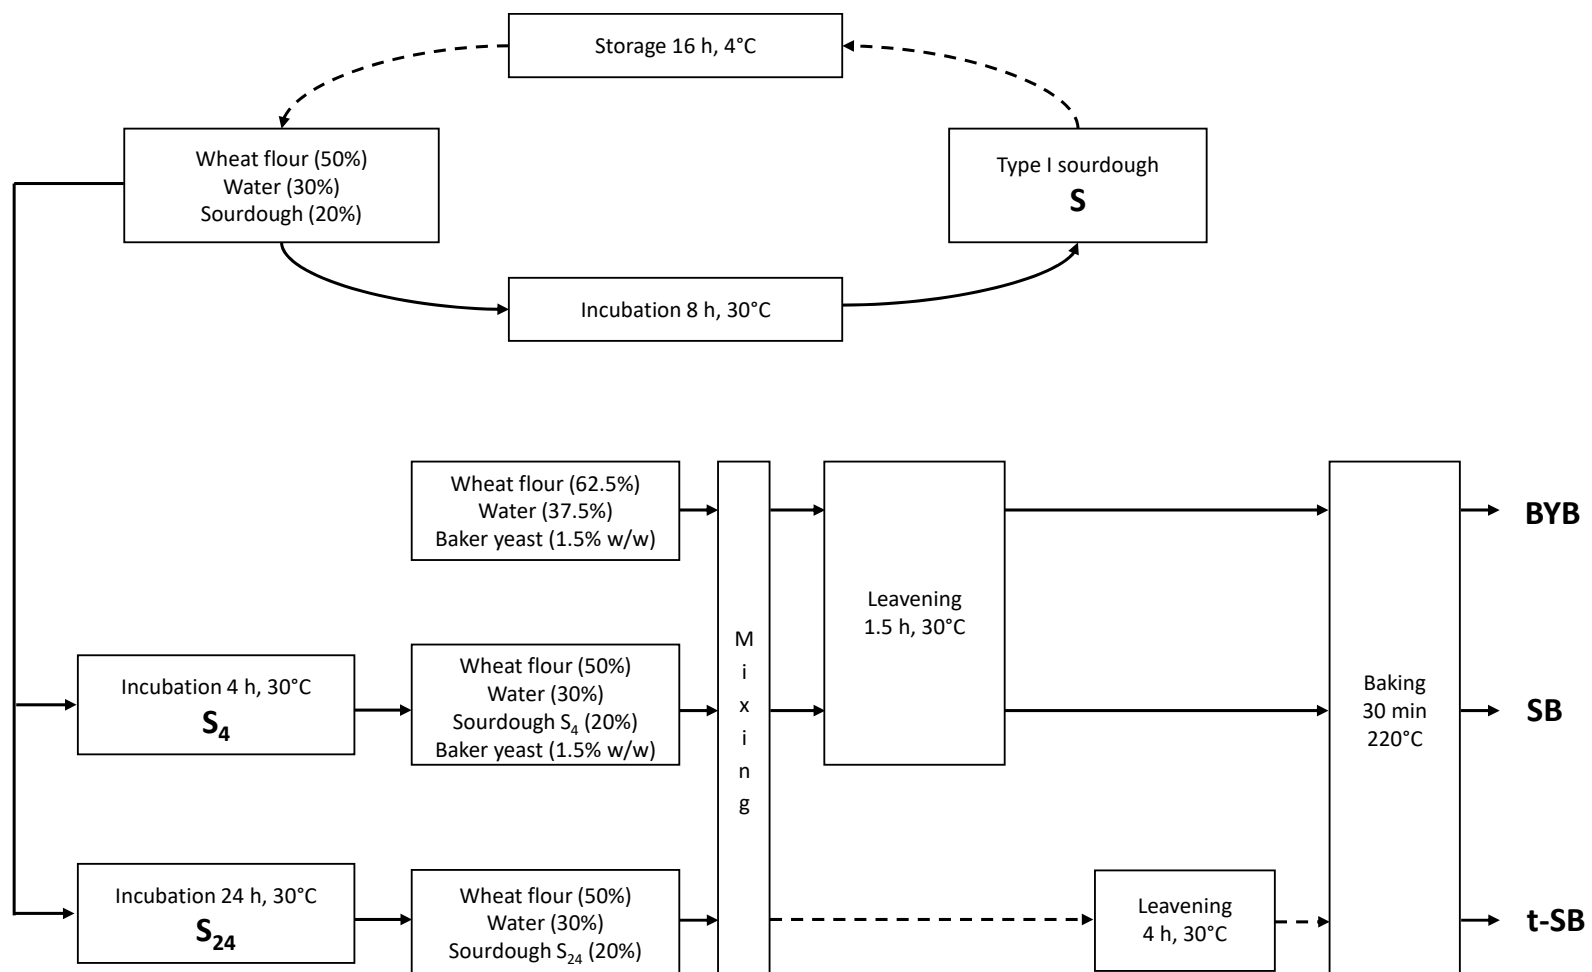

**Figure S1.** Flowchart of breadmaking.
